# Supplementary material
Source: MDPI journal article supplement (https://www.mdpi.com/2673-6497/1/1/3)
Supplement: s1 [file s1]

List of changes (red color)

P1 Affiliation: Ibaraki 305-8573

Abstract : y -> y

P2 Raman scattering -> Raman scattering,

P3 Raman band, -> Raman bands,

P4 [20] -> [13]

P5,6 T -> T

P5 [21] -> [13]

Fig. 4 : [22] -> [21]

[23] -> [22,23]

P6,7 x -> x

P6 Fig.5 : mixed alkali -> mixed-alkali

P8 y -> y

P9 add "GPa" to the constant "A"

P10 y -> y

P10,11, and 12 [22] -> [21]

P12 y -> y

P13 Conflicts of Interest: The author declares no conflict of interest.

P13 Ref.2 is changed : Bray, P.J.: NMR studies of the structures of glasses. *J. Non-Cryst. Solids* **1987**, 95&96, 45–60.

P13 Ref.22 is changed to ref. 21.

P13 Ref. 22 is changed : Zeller R. C., Pohl R. O. Thermal Conductivity and Specific Heat of Non-crystalline Solids. *Phys. Rev. B* **1971**, 4, 2029-2040

Commented [M1]: Ref 2 & 18 are the same. Please revise it.

Commented [k2R1]: Ref. 2 is changed.
